# Supplementary material
Source: publisher figshare collection journal article supplement (https://acs.figshare.com/ndownloader/files/14602310)
Supplement: Supplementary file 1 [file 14602310]

Supplementary data belonging to manuscript:

**Synthesis and characterization of sialylated lactose and lactulose derived oligosaccharides by *Trypanosoma cruzi* trans-sialidase**

Hien T. T. Pham<sup>1</sup>, Geert A. ten Kate,<sup>1,2</sup> Lubbert Dijkhuizen<sup>1,3,#</sup>, and Sander S. van Leeuwen<sup>1,4</sup>

<sup>1</sup>Microbial Physiology, Groningen Biomolecular Sciences and Biotechnology Institute (GBB), University of Groningen, Nijenborgh 7, 9747 AG Groningen, The Netherlands

<sup>2</sup>Current address: Eurofins Carbohydrate Competence Centre, 8440 AT, Heerenveen, The Netherlands

<sup>3</sup>Current address: CarbExplore Research BV, Zernikepark 12, 9747 AN Groningen, The Netherlands

<sup>4</sup>Current address: Laboratory Medicine, University Medical Center Groningen, Hanzeplein 1, 9713 GZ, Groningen, The Netherlands

#Corresponding author: [L.Dijkhuizen@rug.nl](mailto:L.Dijkhuizen@rug.nl)

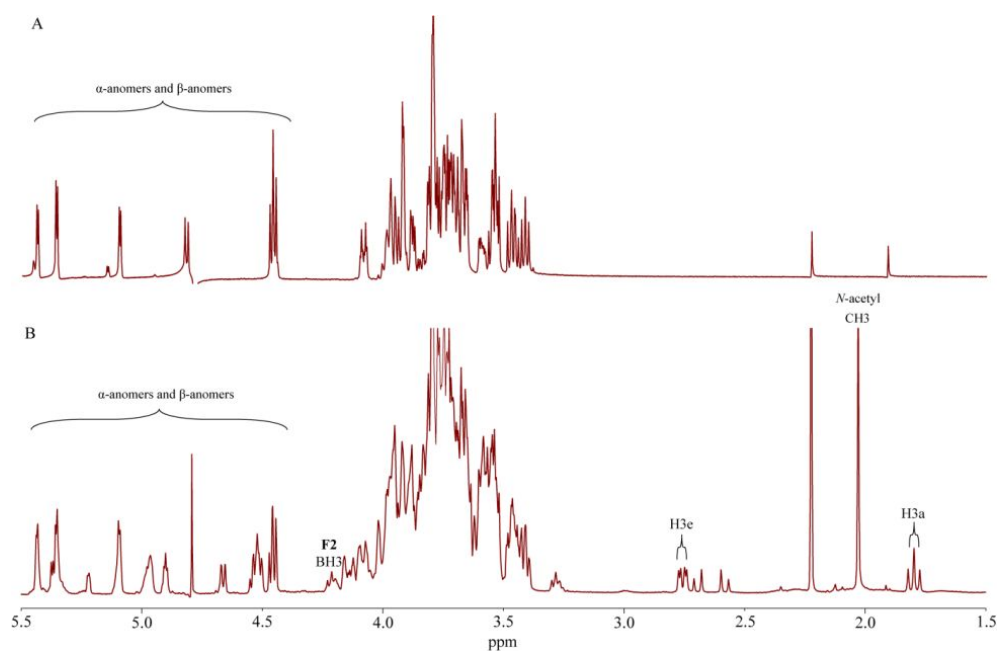

**Figure S1:** 500 MHz  $^1\text{H}$  NMR spectra, recorded in  $\text{D}_2\text{O}$  at 25 °C of A) structure F2 2-glc-lac and B) the GL34 mixture after *trans*-sialylation incubation of 10 mM GL34 plus 5 mM GMP-derived Neu5Ac( $\alpha 2 \rightarrow 3$ ) with TcTS ( $10 \mu\text{g mL}^{-1}$ ) at 25 °C for 24 h.

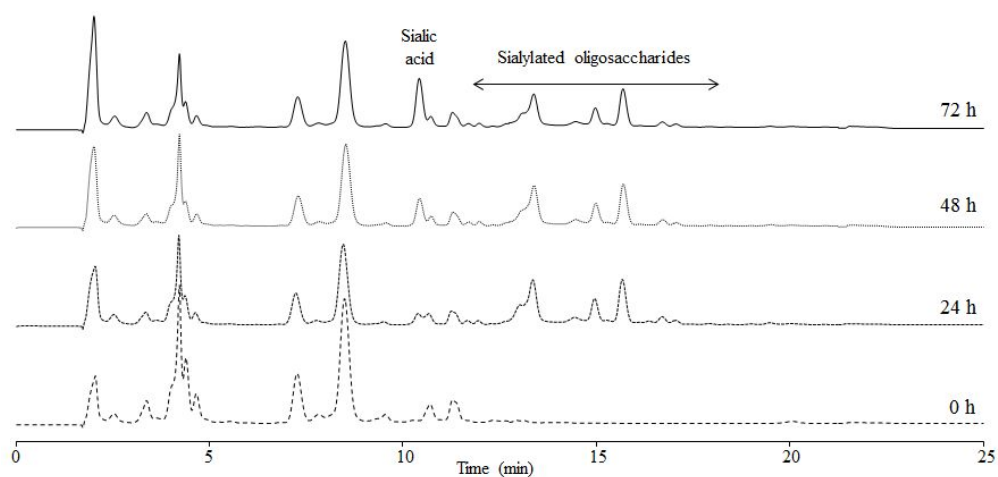

**Figure S2:** HPAEC-PAD profiles of compounds in the reaction mixtures of 5 mM LGOS/5mM GMP-derived Neu5Ac( $\alpha 2 \rightarrow 3$ )/5  $\mu\text{g mL}^{-1}$  TcTS at 25 °C and pH 5.0 after various incubation times, and renewed addition of TcTS (5  $\mu\text{g mL}^{-1}$ ) after each 24 h of incubation.

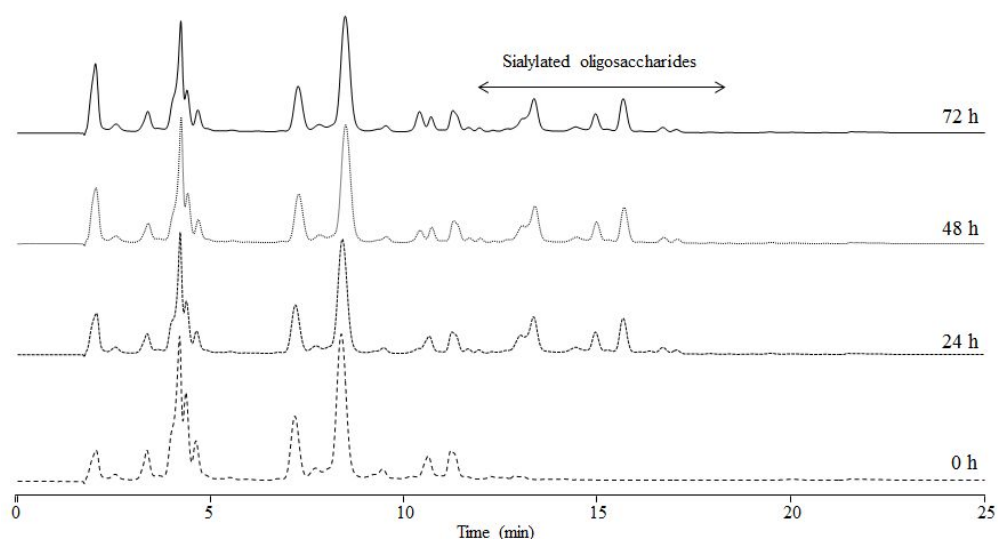

**Figure S3:** HPAEC-PAD profiles of compounds in the reaction mixtures of 10 mM LGOS/5mM GMP-derived Neu5Ac( $\alpha$ 2 $\rightarrow$ 3)/5  $\mu$ g mL<sup>-1</sup> TcTS at 25 °C and pH 5.0 after various incubation times, and renewed addition of TcTS (5  $\mu$ g mL<sup>-1</sup>) after each 24 h of incubation.

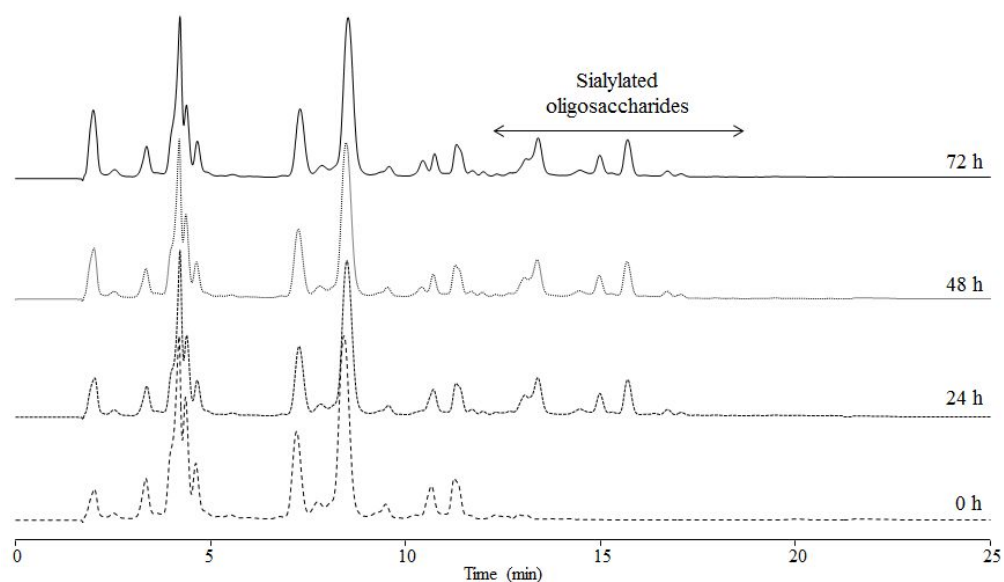

**Figure S4:** HPAEC-PAD profiles of compounds in the reaction mixtures of 15 mM LGOS/5mM GMP-derived Neu5Ac( $\alpha$ 2 $\rightarrow$ 3)/5  $\mu$ g mL<sup>-1</sup> TcTS at 25 °C and pH 5.0 after various incubation times, and renewed addition of TcTS (5  $\mu$ g mL<sup>-1</sup>) after each 24 h of incubation.

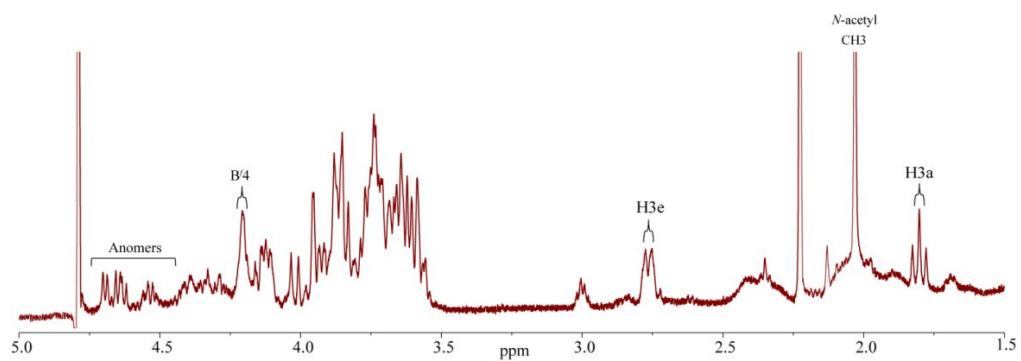

**Figure S5:** 500 MHz <sup>1</sup>H NMR spectra, recorded in D<sub>2</sub>O at 25 °C of the Dowex 1x8 (Cl<sup>-</sup>) Sia-LGOS fraction eluted by 50 mM ammonium bicarbonate from the incubation of 1 mM LGOS plus 5 mM GMP-derived Neu5Ac(α2→3) with TcTS (10 μg mL<sup>-1</sup>) at 25 °C for 48 h.
